# Supplementary material for: Coupling between conformational dynamics and catalytic function at the active site of the lead-dependent ribozyme
Source: PubMed Central journal article supplement — RNA. 2018 Nov;24(11):1542–54. doi: 10.1261/rna.067579.118 (PMC6191710; doi:10.1261/rna.067579.118), 2018-11
Supplement: supp_067579.118_Supplemental_Information.pdf [file supp_067579.118_Supplemental_Information.pdf]

Supplementary Information

for

**Ribose-Ring Dynamics are Obligatory for Catalytic Function at the Active Site of the Lead-Dependent Ribozyme**

Neil A. White<sup>1†</sup>, Minako Sumita<sup>1‡</sup>, Victor E. Marquez<sup>2</sup>, and Charles G. Hoogstraten<sup>1,\*</sup>

**Table S1. Relaxation rates in the lead-dependent ribozyme.** Transverse relaxation rates are listed at the nominal spin-lock power ( $\omega_1$ ). Dispersion plots (Figure 6, main text) were constructed and analyzed by calculating the effective spin-lock power  $\omega_{\text{eff}}$  as the vector sum of  $\omega_1$  and the listed resonance offset.

|         | Offset  (Hz) | $R_1$ ( $\text{s}^{-1}$ ) | $R_{1p}$ ( $\text{s}^{-1}$ ) |                |                |                |
|---------|--------------|---------------------------|------------------------------|----------------|----------------|----------------|
|         |              |                           | 1.5 kHz                      | 2.0 kHz        | 2.5 kHz        | 3.0 kHz        |
| C2 C2'  | 560          | $2.44 \pm 0.06$           | $14.6 \pm 0.7$               | $13.3 \pm 1.7$ | $13.6 \pm 0.7$ | $13.0 \pm 0.6$ |
| C5 C2'  | 544          | $1.43 \pm 0.09$           | $14.3 \pm 2.9$               | $23.6 \pm 4.2$ | $13.4 \pm 1.9$ | $13.3 \pm 1.5$ |
| C6 C2'  | 487          | $1.45 \pm 0.10$           | $31.8 \pm 5.5$               | $28.7 \pm 3.6$ | $36.2 \pm 6.8$ | $35.2 \pm 6.2$ |
| C6 C4'  | 526          | $1.23 \pm 0.14$           | $38.4 \pm 5.6$               | $36.4 \pm 1.5$ | $38.2 \pm 6.3$ | $31.0 \pm 4.4$ |
| C10 C2' | 543          | $2.47 \pm 0.08$           | $12.4 \pm 1.3$               | $12.0 \pm 1.6$ | $12.4 \pm 0.8$ | $13.5 \pm 1.2$ |
| C10 C4' | 514          | $1.55 \pm 0.24$           | $30.7 \pm 4.4$               | $42.0 \pm 4.2$ | $34.0 \pm 4.9$ | $28.8 \pm 2.9$ |
| C11 C2' | 554          | $1.83 \pm 0.06$           | $19.5 \pm 0.9$               | $15.1 \pm 1.1$ | $17.4 \pm 0.8$ | $17.5 \pm 1.4$ |
| C14 C2' | 503          | $2.71 \pm 0.06$           | $10.3 \pm 0.5$               | $13.2 \pm 0.7$ | $10.9 \pm 0.6$ | $11.0 \pm 0.9$ |
| C28 C2' | 560          | $2.38 \pm 0.06$           | $13.4 \pm 0.8$               | $13.3 \pm 1.7$ | $12.9 \pm 0.7$ | $13.3 \pm 1.1$ |
| C30 C2' | 240          | $1.91 \pm 0.05$           | $15.6 \pm 1.4$               | $12.4 \pm 1.0$ | $17.1 \pm 0.9$ | $15.9 \pm 1.4$ |
| C30 C4' | 643          | $1.83 \pm 0.08$           | $22.0 \pm 2.4$               | $22.8 \pm 2.5$ | $23.2 \pm 1.8$ | $23.7 \pm 2.0$ |

| Resonance | $R_{lp} (s^{-1})$ |                |                |                |                |                |
|-----------|-------------------|----------------|----------------|----------------|----------------|----------------|
|           | 3.5 kHz           | 4.0 kHz        | 4.5 kHz        | 5.0 kHz        | 5.5 kHz        | 6.0 kHz        |
| C2 C2'    | $12.6 \pm 0.3$    | $13.0 \pm 0.4$ | $12.3 \pm 0.5$ | $12.4 \pm 0.8$ | $12.2 \pm 0.8$ | $12.4 \pm 0.2$ |
| C5 C2'    | $10.2 \pm 1.14$   | $12.0 \pm 1.1$ | $15.7 \pm 3.0$ | $15.3 \pm 4.0$ | $16.4 \pm 9.5$ | $17.2 \pm 2.0$ |
| C6 C2'    | $29.6 \pm 5.6$    | $31.8 \pm 6.4$ | $29.8 \pm 5.9$ | $25.9 \pm 3.8$ | $34.8 \pm 5.7$ | $29.8 \pm 5.3$ |
| C6 C4'    | $31.2 \pm 5.6$    | $33.9 \pm 4.7$ | $32.3 \pm 6.6$ | $26.6 \pm 4.4$ | $25.9 \pm 4.0$ | $25.8 \pm 7.3$ |
| C10 C2'   | $12.7 \pm 0.6$    | $11.0 \pm 0.7$ | $11.0 \pm 0.6$ | $12.1 \pm 0.9$ | $11.6 \pm 1.1$ | $11.9 \pm 0.7$ |
| C10 C4'   | $43.1 \pm 4.0$    | $30.5 \pm 3.7$ | $38.3 \pm 6.5$ | $27.1 \pm 5.9$ | $27.1 \pm 5.9$ | $31.5 \pm 5.9$ |
| C11 C2'   | $16.4 \pm 0.5$    | $17.3 \pm 0.9$ | $16.0 \pm 0.5$ | $16.0 \pm 1.5$ | $16.1 \pm 1.5$ | $16.4 \pm 0.5$ |
| C14 C2'   | $10.4 \pm 0.3$    | $10.3 \pm 0.5$ | $9.8 \pm 0.6$  | $9.4 \pm 1.0$  | $9.6 \pm 0.7$  | $10.1 \pm 0.4$ |
| C28 C2'   | $13.2 \pm 0.5$    | $13.2 \pm 0.5$ | $12.2 \pm 0.4$ | $11.6 \pm 1.1$ | $12.4 \pm 0.8$ | $11.9 \pm 0.4$ |
| C30 C2'   | $16.4 \pm 0.3$    | $16.1 \pm 0.8$ | $15.5 \pm 0.6$ | $14.9 \pm 1.4$ | $15.8 \pm 1.1$ | $16.3 \pm 0.5$ |
| C30 C4'   | $20.2 \pm 0.9$    | $20.6 \pm 1.3$ | $20.5 \pm 1.3$ | $19.5 \pm 2.0$ | $18.5 \pm 1.3$ | $19.9 \pm 1.2$ |

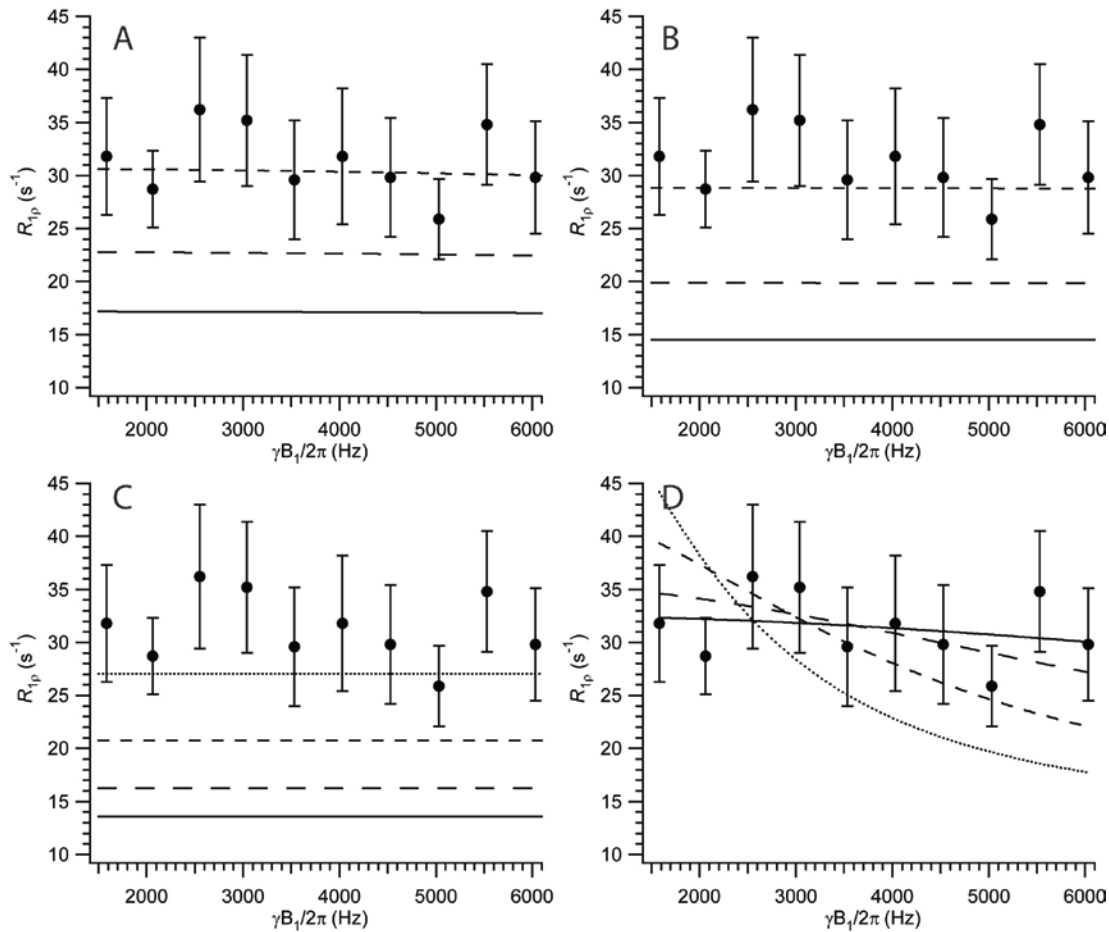

**Figure S1. Determination of upper and lower bounds for exchange lifetime.** Comparison of experimental data for C6 C2' (main text, Figure 6) with: A), Simulated dispersion curves for  $\tau_{\text{ex}} = 5 \mu\text{s}$  and  $\Delta\omega_{\text{min}} = 2 \text{ ppm}$  (solid), 3 ppm (long dash), 4 ppm (short dash); B), Simulated dispersion curves for  $\tau_{\text{ex}} = 2 \mu\text{s}$  and  $\Delta\omega_{\text{min}} = 2 \text{ ppm}$  (solid), 4 ppm (long dash), 6 ppm (short dash); C), Simulated dispersion curves for  $\tau_{\text{ex}} = 1 \mu\text{s}$  and  $\Delta\omega_{\text{min}} = 2 \text{ ppm}$  (solid), 4 ppm (long dash), 6 ppm (short dash), 8 ppm (dots); D), Dispersion curves at  $\tau_{\text{ex}} = 10 \mu\text{s}$  (solid),  $20 \mu\text{s}$  (long dash),  $40 \mu\text{s}$  (short dash),  $80 \mu\text{s}$  (dots) and the corresponding best-fit values of  $\Delta\omega_{\text{min}}$ .  $R_{1\rho}^{\circ}$  was set to  $12.7 \text{ s}^{-1}$  in all cases.
